# Supplementary material
Source: MDPI journal article supplement (https://www.mdpi.com/2673-4591/19/1/10)
Supplement: s1 [file s1]

Li<sub>1+y</sub>Ti<sub>2-x-y</sub>Ge<sub>x</sub>Al<sub>y</sub>(PO<sub>4</sub>)<sub>3</sub> NASICON-type electrolytes with enhanced conductivity for solid state lithium-ion batteries

E.A. Kurzina, I.A. Stenina

Kurnakov Institute of General and Inorganic Chemistry RAS

The use of NASICON-type phosphates in lithium-ion batteries

- advantages:

  - More resistant to high temperatures,
  - Less flammable
  - More electrochemically stable
- disadvantages:

  - Low ionic conductivity
  - Poor contact of the electrode and electrolyte

Lithium-titanium phosphates - LiTi<sub>2</sub>(PO<sub>4</sub>)<sub>3</sub>  
Space group R-3c; a= 8,5129 Å, c = 20,8780 Å  
Ionic conductivity σ < 10<sup>-6</sup> S/cm at 50°C

Enhancing ionic conductivity:  
Iso- and heterovalent doping;

The aim of this research:  
Synthesis and investigation of ionic conductivity  
Li<sub>1+y</sub>Ti<sub>2-x-y</sub>Ge<sub>x</sub>Al<sub>y</sub>(PO<sub>4</sub>)<sub>3</sub>(y = 0-0.3)

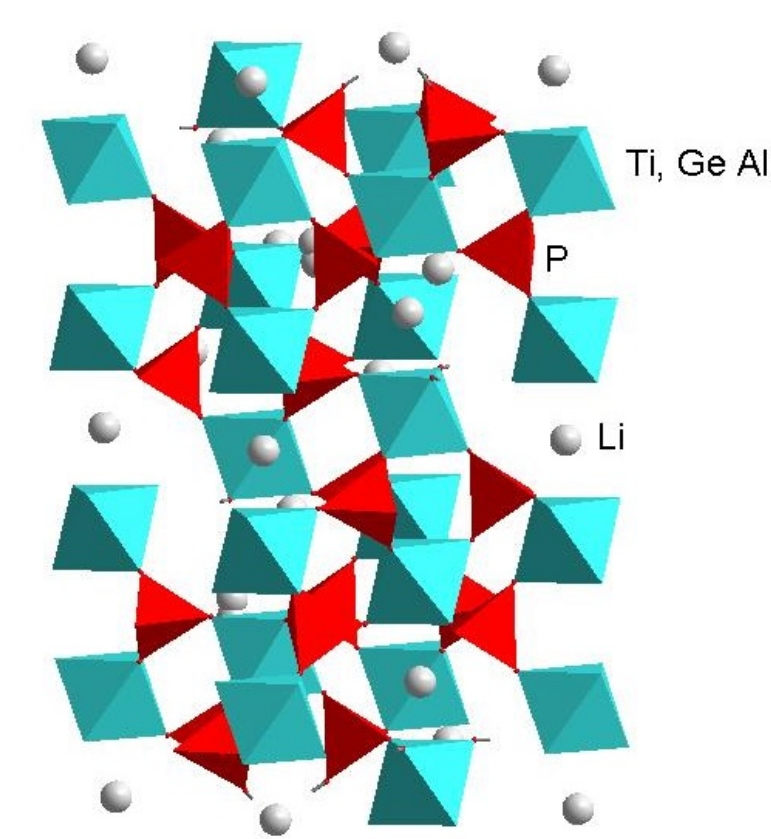

Crystal structure of Li<sub>1+y</sub>Ti<sub>1.6</sub>Ge<sub>0.2</sub>Al<sub>0.2</sub>(PO<sub>4</sub>)<sub>3</sub>

Investigation of sintering process of Li<sub>1+y</sub>Ti<sub>1.8-y</sub>Ge<sub>0.2</sub>Al<sub>y</sub>(PO<sub>4</sub>)<sub>3</sub>

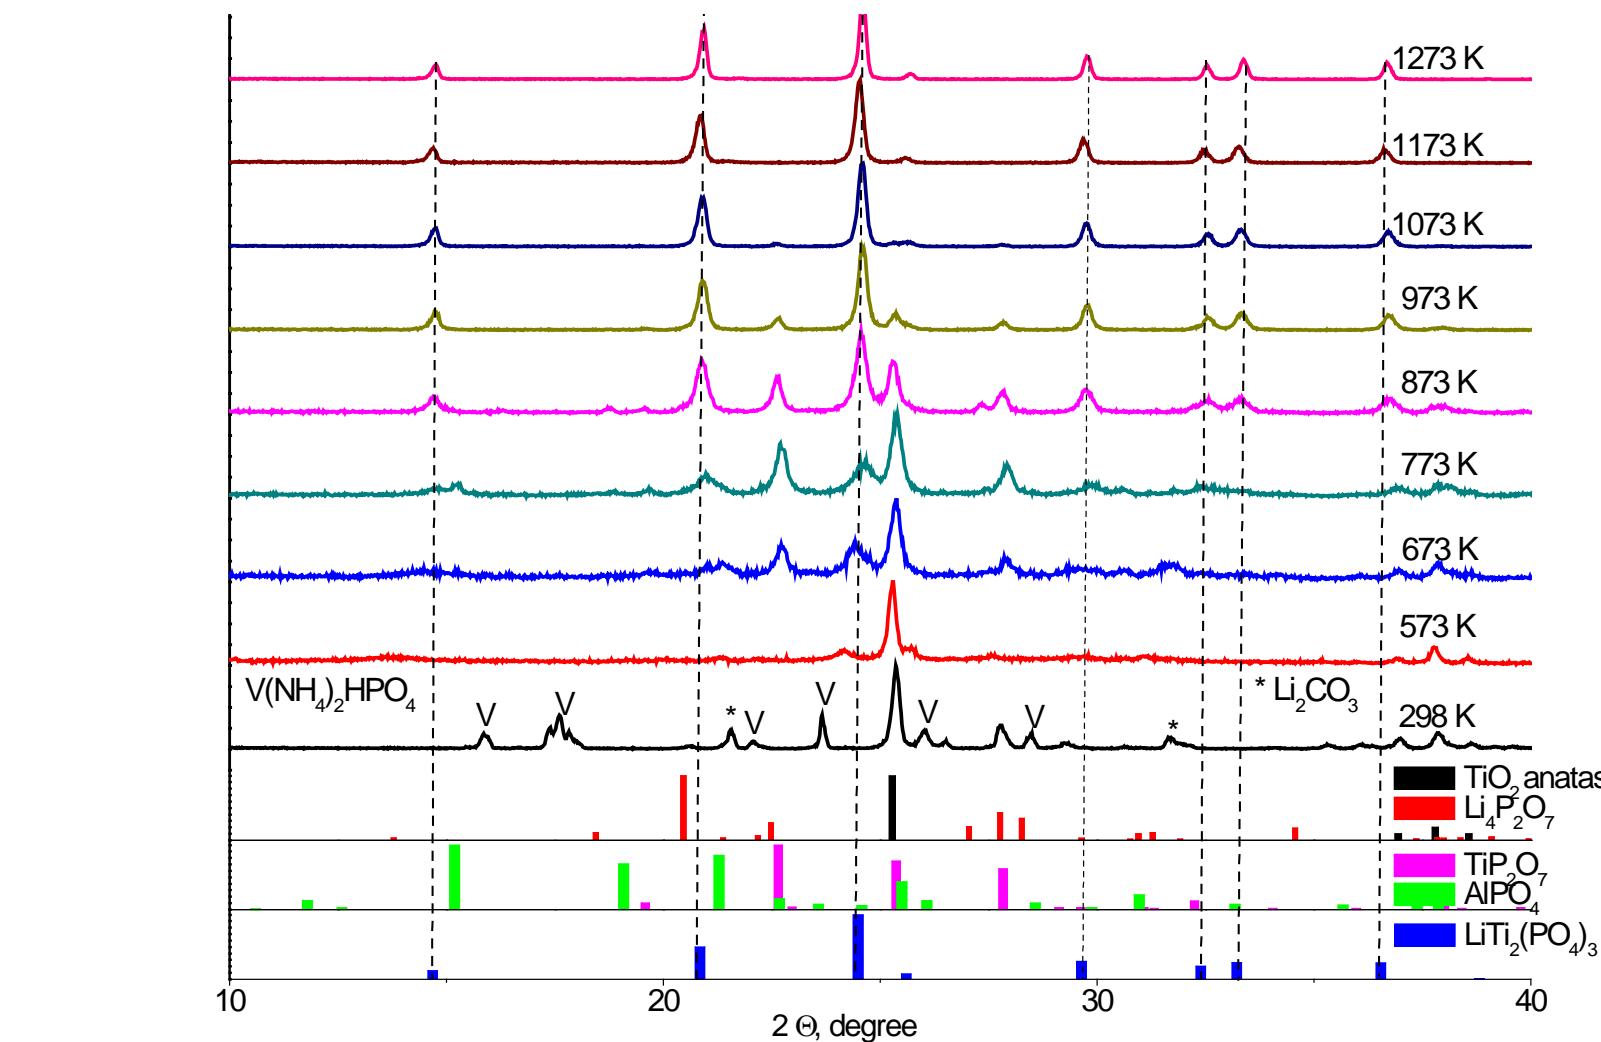

XRD patterns of a mixture Li<sub>2</sub>CO<sub>3</sub>+3.2TiO<sub>2</sub>+0.4GeO<sub>2</sub>+0.2Al<sub>2</sub>O<sub>3</sub>+6(NH<sub>4</sub>)<sub>2</sub>HPO<sub>4</sub> at 298 K and after sintering for 5 h at different temperatures

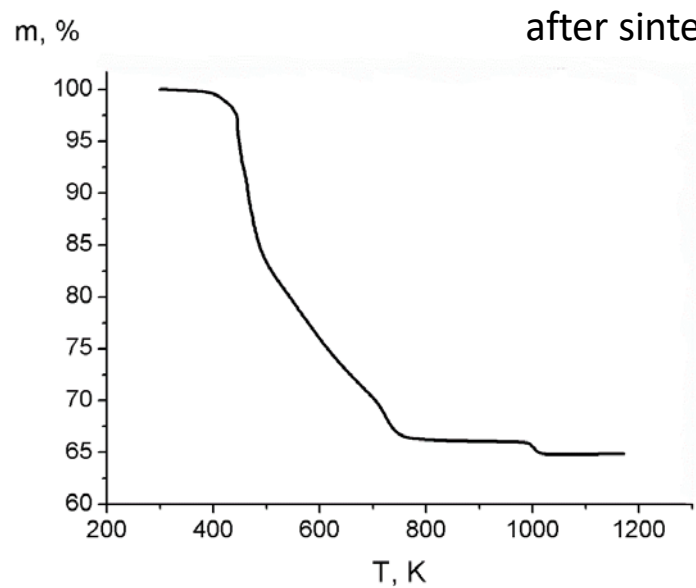

Weight loss curve of a mixture Li<sub>2</sub>CO<sub>3</sub>+3.2TiO<sub>2</sub>+0.4GeO<sub>2</sub>+0.2Al<sub>2</sub>O<sub>3</sub>+6(NH<sub>4</sub>)<sub>2</sub>HPO<sub>4</sub>

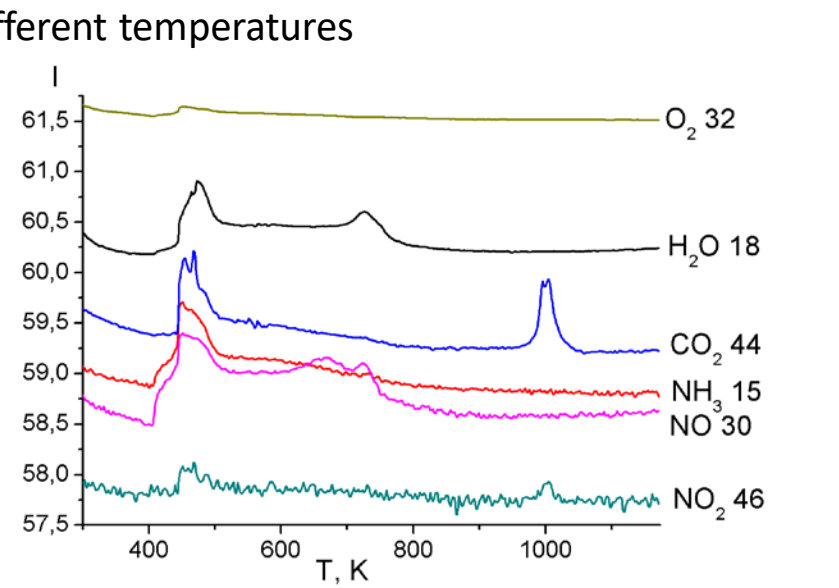

Ion currents at thermal analysis of a mixture Li<sub>2</sub>CO<sub>3</sub>+3.2TiO<sub>2</sub>+0.4GeO<sub>2</sub>+0.2Al<sub>2</sub>O<sub>3</sub>+6(NH<sub>4</sub>)<sub>2</sub>HPO<sub>4</sub>

Synthesis scheme

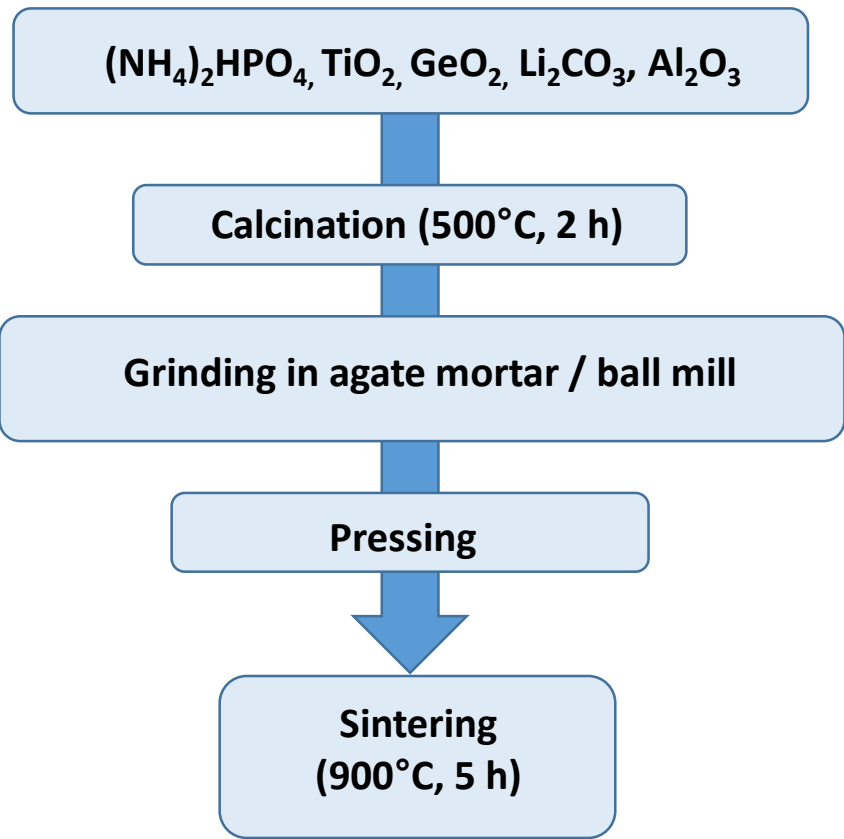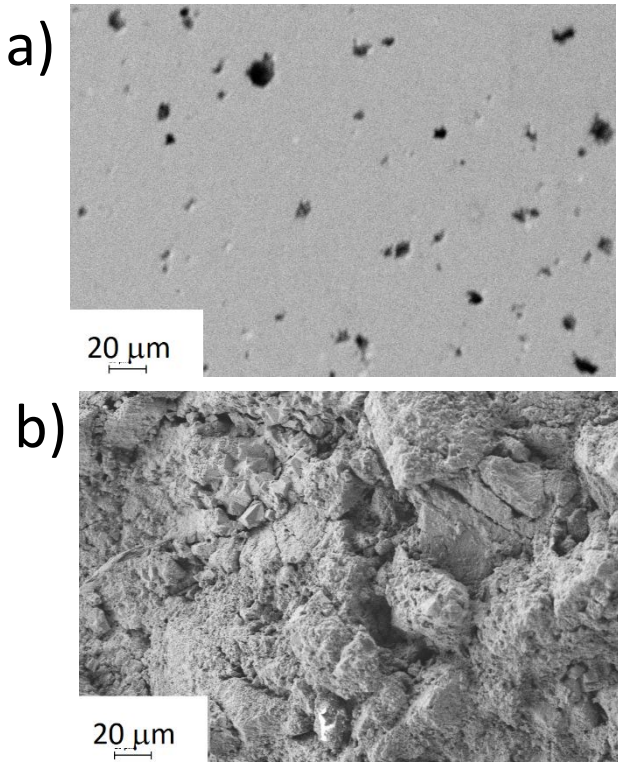

SEM-images of polished pellets of Li<sub>1+y</sub>Ti<sub>1.6</sub>Ge<sub>0.2</sub>Al<sub>0.2</sub>(PO<sub>4</sub>)<sub>3</sub> prepared with different modes of precursor ball-milling: a) 400 rpm, 99 cycles; b) 600 rpm, 99 cycles

Influence of heterovalent doping of LiTi<sub>2</sub>(PO<sub>4</sub>)<sub>3</sub> on ionic conductivity

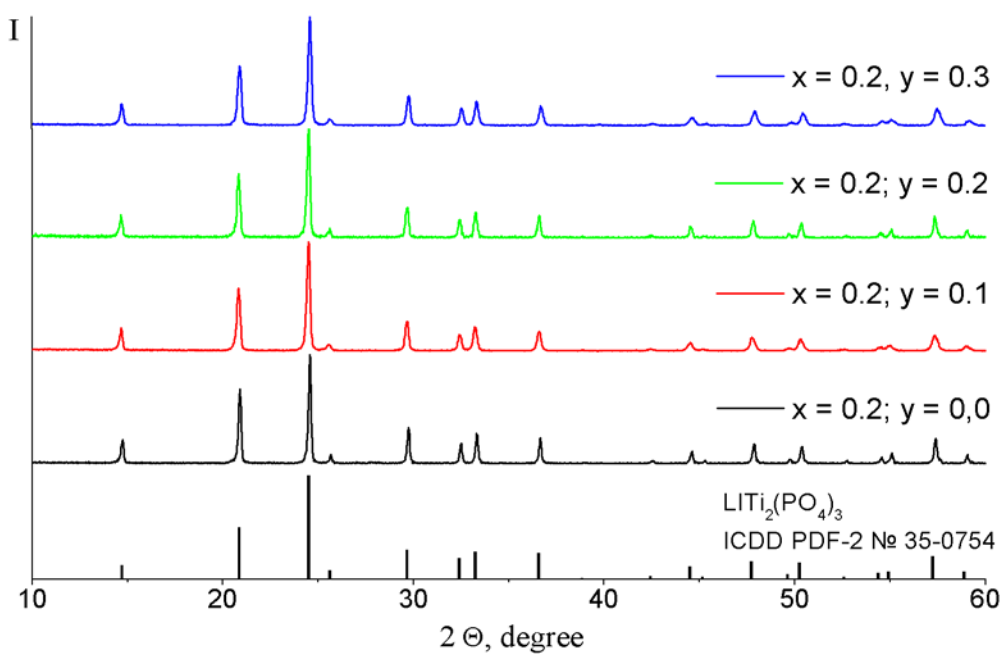

XRD patterns of Li<sub>1+y</sub>Ti<sub>1.8-y</sub>Ge<sub>0.2</sub>Al<sub>y</sub>(PO<sub>4</sub>)<sub>3</sub>\*

Unit cell parameters of Li<sub>1+y</sub>Ti<sub>1.8-y</sub>Ge<sub>0.2</sub>Al<sub>y</sub>(PO<sub>4</sub>)<sub>3</sub>  
(space group R-3c)

| y   | a, Å      | c, Å      |
|-----|-----------|-----------|
| 0   | 8,4924(5) | 20,851(4) |
| 0.1 | 8.4774(4) | 20.876(2) |
| 0.2 | 8.4752(8) | 20.880(5) |
| 0.3 | 8.4594(4) | 20.833(2) |

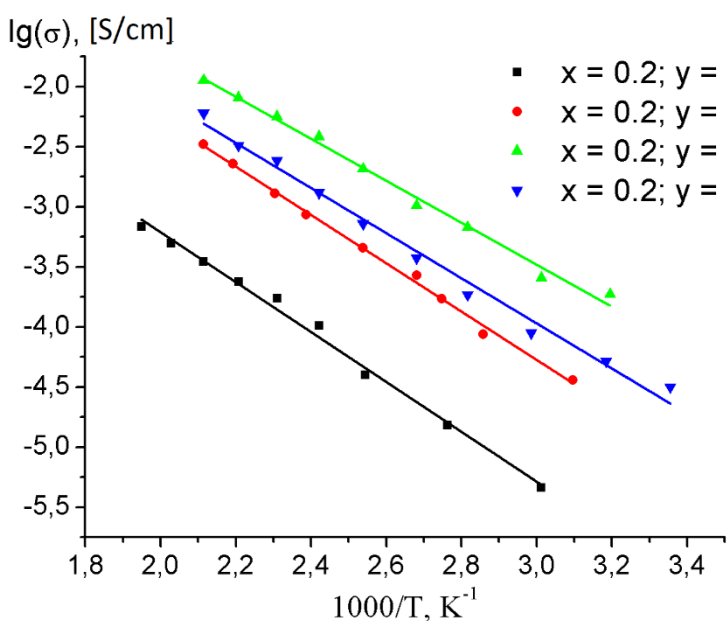

Variation of log(σ) vs 1000/T for Li<sub>1+y</sub>Ti<sub>1.8-y</sub>Ge<sub>0.2</sub>Al<sub>y</sub>(PO<sub>4</sub>)<sub>3</sub>

Activation energy of Li<sub>1+y</sub>Ti<sub>1.8-y</sub>Ge<sub>0.2</sub>Al<sub>y</sub>(PO<sub>4</sub>)<sub>3</sub>

| y   | E <sub>a</sub> , kJ/mol |
|-----|-------------------------|
| 0   | 40 ± 1                  |
| 0.1 | 38 ± 1                  |
| 0.2 | 31 ± 1                  |
| 0.3 | 36 ± 1                  |

Influence of precursor ball-milling on ionic conductivity of Li<sub>1+y</sub>Ti<sub>1.8-y</sub>Ge<sub>0.2</sub>Al<sub>y</sub>(PO<sub>4</sub>)<sub>3</sub>

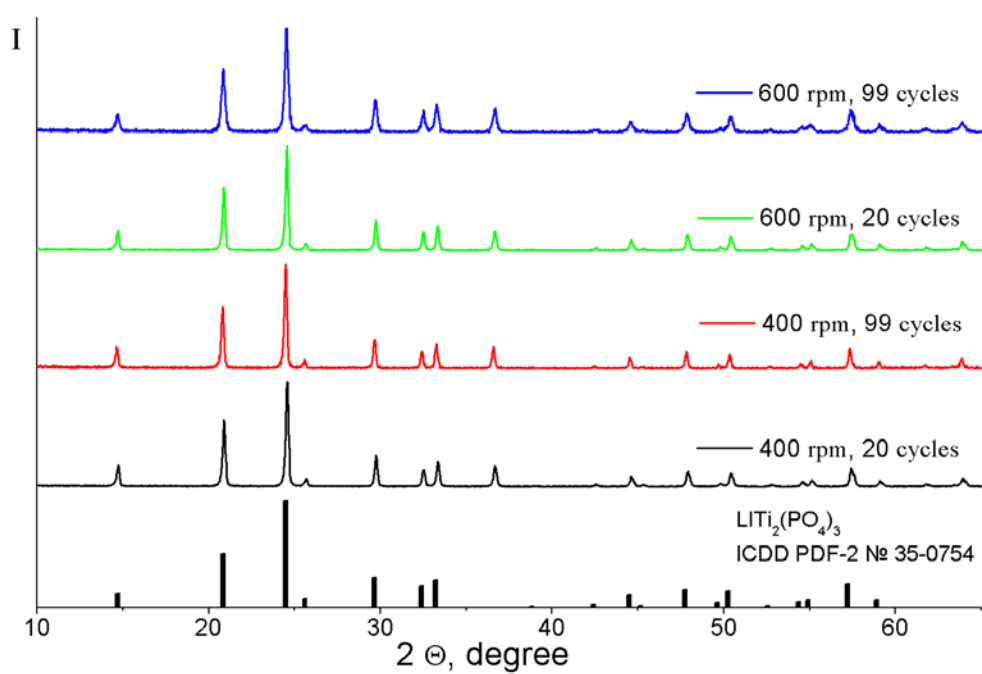

XRD patterns of Li<sub>1+y</sub>Ti<sub>1.8-y</sub>Ge<sub>0.2</sub>Al<sub>y</sub>(PO<sub>4</sub>)<sub>3</sub> prepared with different modes of precursor ball-milling

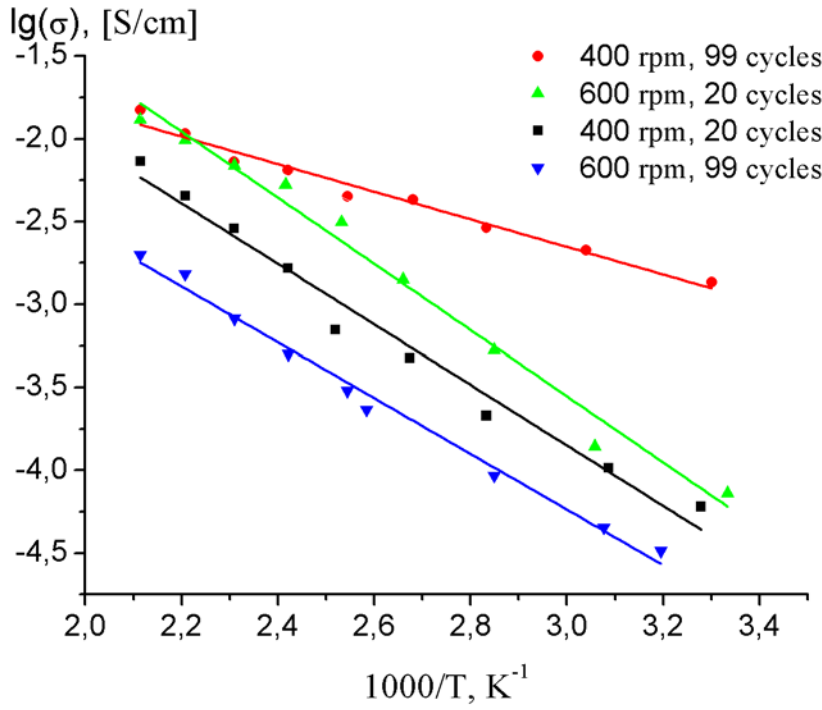

Plots of log(σ) vs 1000/T for Li<sub>1+y</sub>Ti<sub>1.8-y</sub>Ge<sub>0.2</sub>Al<sub>y</sub>(PO<sub>4</sub>)<sub>3</sub> prepared with different modes of precursor ball-milling

Influence different machining on parameters of Li<sub>1+y</sub>Ti<sub>1.8-y</sub>Ge<sub>0.2</sub>Al<sub>y</sub>(PO<sub>4</sub>)<sub>3</sub>

| Rate of ball milling, rpm | Number of cycles | Pellet density, % | Conductivity (298 K), S/cm | E <sub>a</sub> , kJ/mol |
|---------------------------|------------------|-------------------|----------------------------|-------------------------|
| 400                       | 20               | 85                | 6,6 · 10 <sup>-5</sup>     | 35 ± 2                  |
| 400                       | 99               | 97                | 1,4 · 10 <sup>-3</sup>     | 16 ± 2                  |
| 600                       | 20               | 88                | 7,3 · 10 <sup>-5</sup>     | 38 ± 2                  |
| 600                       | 99               | 73                | 3,3 · 10 <sup>-5</sup>     | 32 ± 1                  |

Conclusions:

- ✓Li<sub>1+y</sub>Ti<sub>1.8-y</sub>Ge<sub>0.2</sub>Al<sub>y</sub>(PO<sub>4</sub>)<sub>3</sub> compounds were prepared by solid state reaction and characterized by X-ray diffraction, scanning electron microscopy, <sup>31</sup>P MAS NMR and impedance spectroscopy.
- ✓The optimal germanium content has been determined. The aluminum doping results in increase in lithium conductivity.
- ✓Li<sub>1.2</sub>Ti<sub>1.6</sub>Ge<sub>0.2</sub>Al<sub>0.2</sub>(PO<sub>4</sub>)<sub>3</sub> exhibits the highest ionic conductivity at room temperature (1,4·10<sup>-4</sup> S/cm).
- ✓Detected <sup>31</sup>P NMR signals have been assigned to different PO<sub>4</sub>Ti<sub>4-n-m</sub>Ge<sub>n</sub>Al<sub>m</sub> arrangements assuming a random distribution of Ti,Al, and Ge cations in NASICON compounds. The intensity of the components located at less negative values becomes more intense as the Al content increases.
- ✓The formation of Li<sub>1+y</sub>Ti<sub>1.8-y</sub>Ge<sub>0.2</sub>Al<sub>y</sub>(PO<sub>4</sub>)<sub>3</sub> occurs through the intermediate formation of titanium pyrophosphate.
- ✓The precursor ball-milling before the final annealing leads to a conductivity increase.

<sup>31</sup>P MAS NMR of Li<sub>1+y</sub>Ti<sub>1.8-y</sub>Ge<sub>0.2</sub>Al<sub>y</sub>(PO<sub>4</sub>)<sub>3</sub>

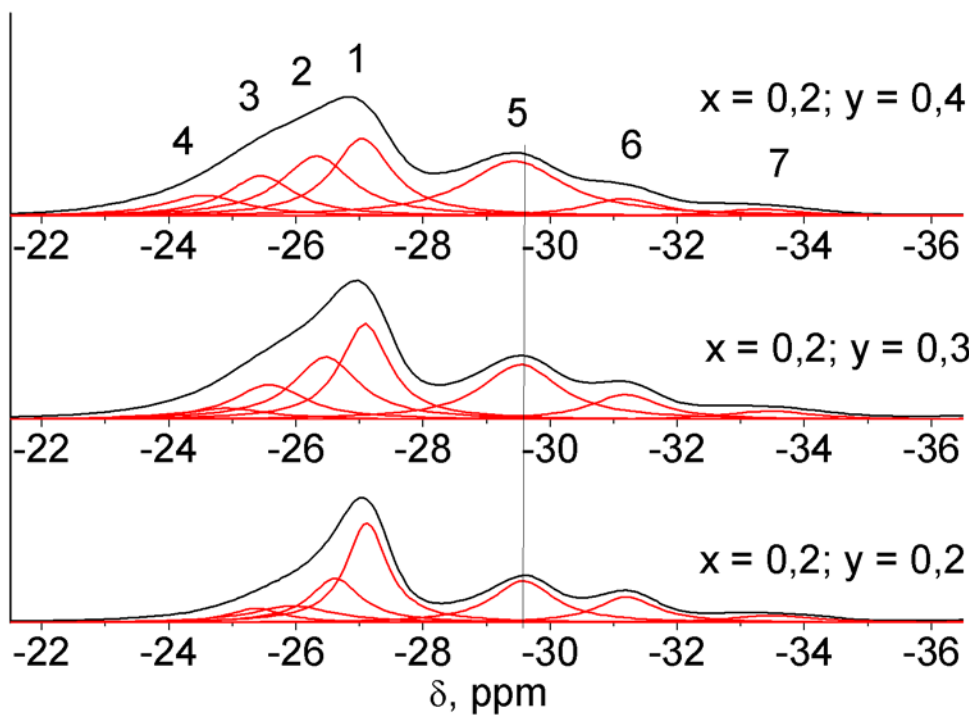

Chemical shifts of 5 peak:

|                  |                 |
|------------------|-----------------|
| X = 0,2; y = 0,2 | δ = - 29,57 ppm |
| X = 0,2; y = 0,3 | δ = - 29,53 ppm |
| X = 0,2; y = 0,4 | δ = - 29,45 ppm |

|   | Environment                                                               | Peak area, % |         |        |  |
|---|---------------------------------------------------------------------------|--------------|---------|--------|--|
|   | X = 0,2                                                                   | Y=0,2        | Y = 0,3 | Y= 0,4 |  |
| 1 | PO <sub>4</sub> Ti <sub>4</sub>                                           | 31,04        | 24,54   | 22,59  |  |
| 2 | PO <sub>4</sub> Ti <sub>3</sub> Al                                        | 16,92        | 22,36   | 20,63  |  |
| 3 | PO <sub>4</sub> Ti <sub>2</sub> Al <sub>2</sub>                           | 6,93         | 9,08    | 13,07  |  |
| 4 | PO <sub>4</sub> TiAl <sub>3</sub>                                         | 8,96         | 8,87    | 8,12   |  |
| 5 | PO <sub>4</sub> Ti <sub>3</sub> Ge + PO <sub>4</sub> Ti <sub>2</sub> GeAl | 19,50        | 21,43   | 26,08  |  |
| 6 | PO <sub>4</sub> Ti <sub>2</sub> Ge <sub>2</sub>                           | 11,46        | 8,00    | 6,40   |  |
| 7 | PO <sub>4</sub> TiGe <sub>3</sub>                                         | 4,12         | 4,07    | 2,91   |  |

\* The highest ionic conductivity of LiTi<sub>2-x</sub>Ge<sub>x</sub>(PO<sub>4</sub>)<sub>3</sub> was found for x = 0.2 / Kurzina E. A., Stenina I. A., Dalvi A., Yaroslavtsev A.B. Synthesis and Ionic Conductivity of Lithium Titanium Phosphate-Based Solid Electrolytes. *Inorg. Mater.* 57 (2021) 1035–1042
